# Supplementary material
Source: Springer Nature journal article supplement (https://www.springermedizin.de/resource/supplementary/12986_2014_611_MOESM3_ESM.pdf/25655140)

## Fasting Blood Glucose

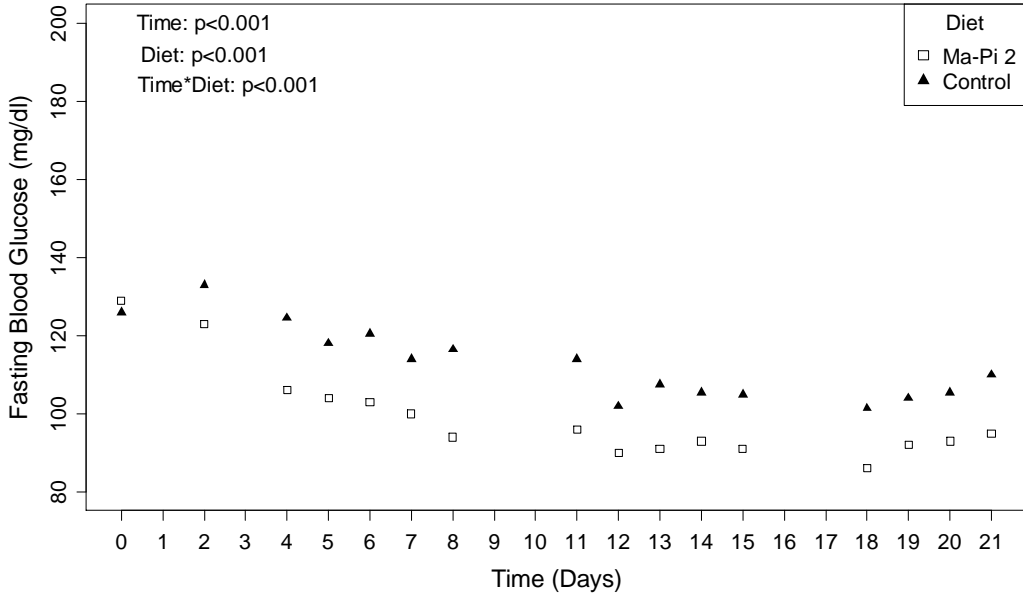

## Post Prandial Capillary Glucose

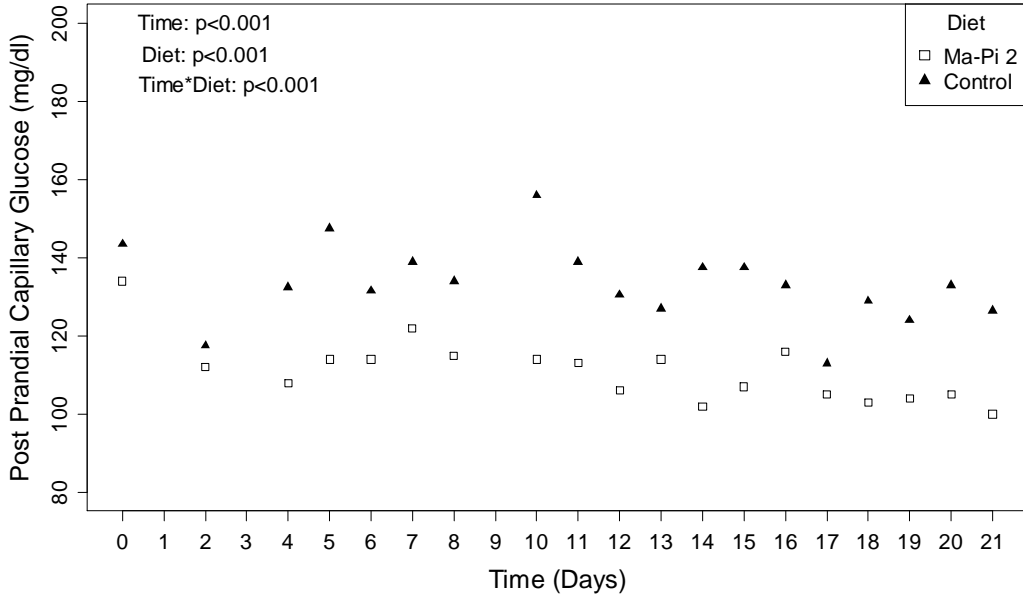

Supplement: MOESM3 [file 25655140]
